# Supplementary material for: Enhanced electrochemical performance of Ce-MOF/h-CeO 2 composites for high-capacitance energy storage applications
Source: Royal Society of Chemistry journal article supplement (doi:10.1039/d4ra00523f), 2024-01-01
Supplement: d4ra00523f1.pdf [file d4ra00523f1.pdf]

## Enhanced Electrochemical Performance of Ce-MOF/h-CeO<sub>2</sub> for high Capacitance Energy Storage Applications

Ruhani Baweja<sup>a</sup>, Monika Verma<sup>b,c</sup>, Sanjeev Gautam<sup>\*,b</sup>, Shailesh Upreti<sup>d</sup>, and Navdeep Goyal<sup>a</sup>

<sup>a</sup>Department of Physics, Panjab University, Chandigarh- 160014, India

<sup>b</sup>Advanced Functional Materials Lab, Dr. S.S.B. University Institute of Chemical Engineering & Technology, Panjab University, Chandigarh- 160014, India

<sup>c</sup>Energy Research Centre, Panjab University, Chandigarh- 160014, India

<sup>d</sup>Charge CCCV (C4V), Center of Excellence, Binghamton University, 45 Murray Hill Road, Vestal, NY 13850, USA

### Ce-MOF and its composites with h-CeO<sub>2</sub> as potential electrode materials for enhanced electrochemical supercapacitor performance

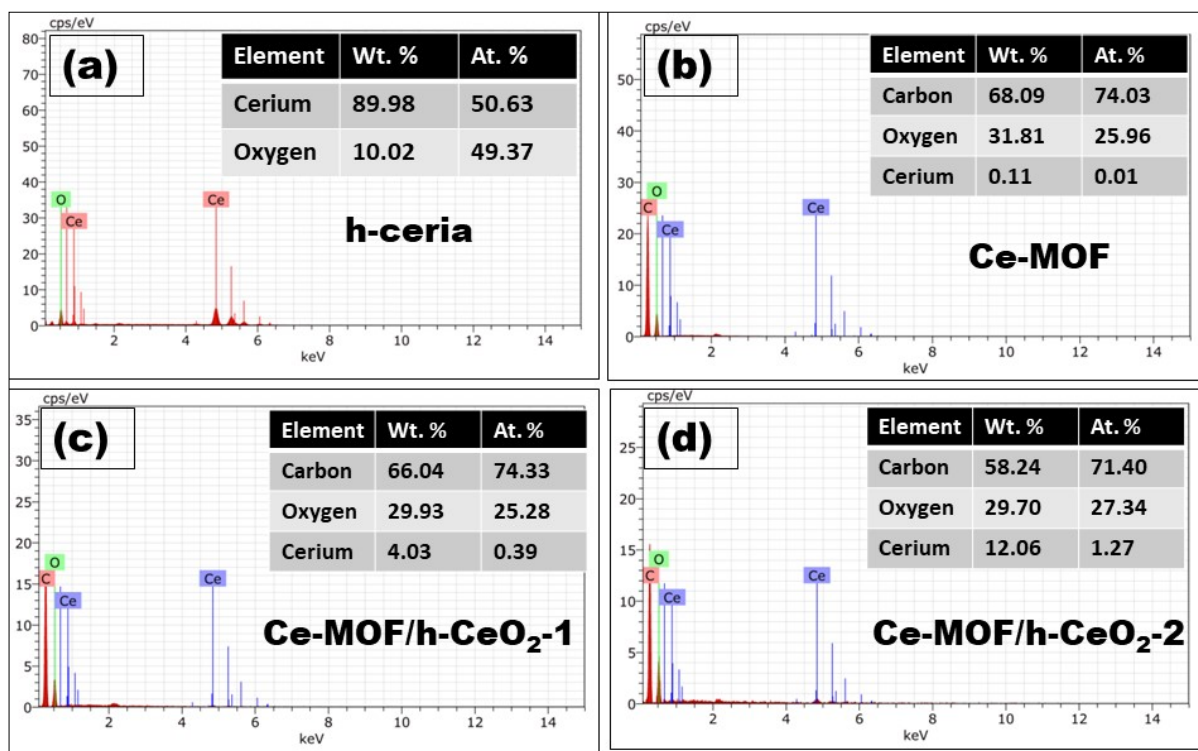

Figure S1: Elemental composition study of (a) h-CeO<sub>2</sub>, (b) Ce-MOF, (c) Ce-MOF/h-CeO<sub>2</sub>-1, and (d) Ce-MOF/h-CeO<sub>2</sub>-2 using EDS analysis

\*Corresponding Author: E-mail: [sgautam@pu.ac.in](mailto:sgautam@pu.ac.in); Tel: +91 97797 13212

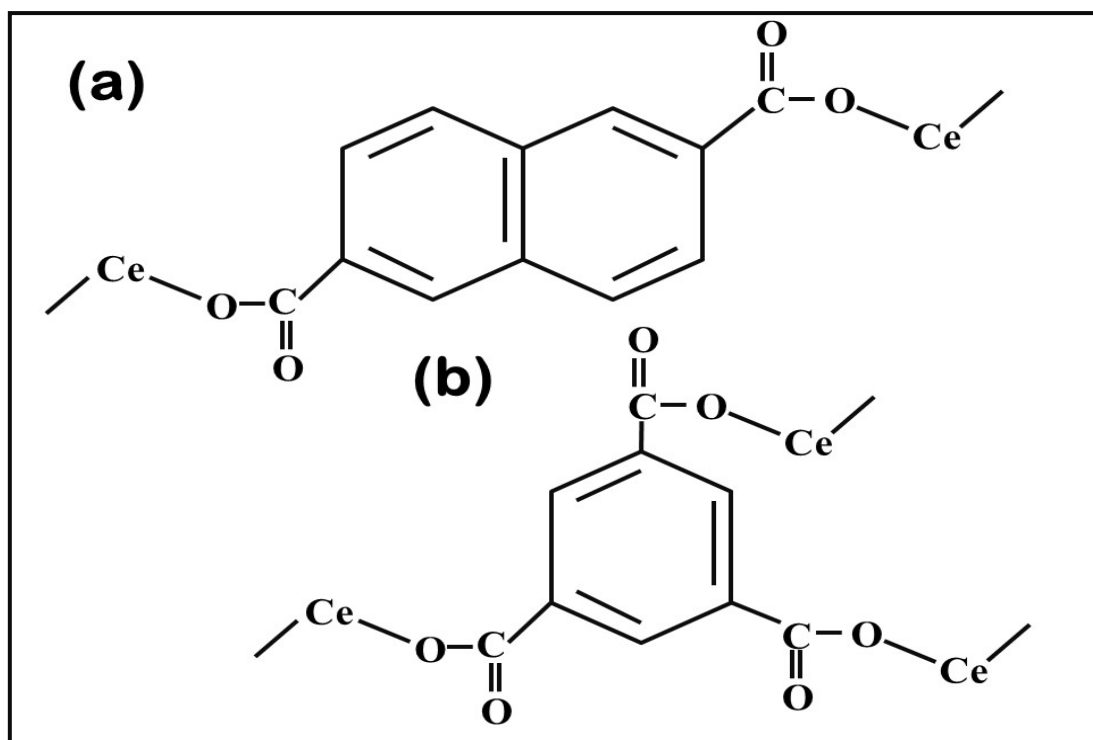

Figure S2: (a) 2,6-dinaphthalene dicarboxylic acid, (b) 1,3,5-tricarboxylic acid

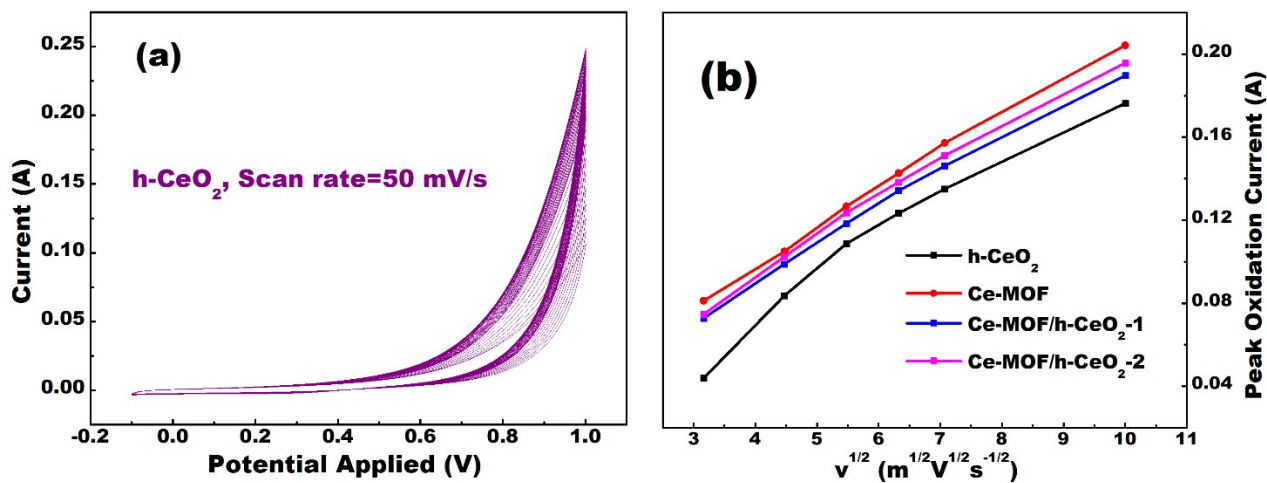

Figure S3: (a) CV curve for h-Ceria at a scan rate of 50 mV/s and 50 cycles, (b) Peak current vs.  $v^{1/2}$  plot to understand the diffusivity of the samples in the electrolyte.

## CIF FILE

```
#####  
###  
### FullProf-generated CIF output file (version: May 2019) ###  
### Template of CIF submission form for structure report ###  
#####  
###
```

```
# This file has been generated using FullProf.2k taking one example of  
# structure report provided by Acta Cryst. It is given as a 'template' with  
# filled structural items. Many other items are left unfilled and it is the  
# responsibility of the user to properly fill or suppress them. In principle  
# all question marks '?' should be replaced by the appropriate text or  
# numerical value depending on the kind of CIF item.  
# See the document: cif_core.dic (URL: http://www.iucr.org) for details.
```

```
# Please notify any error or suggestion to:  
# Juan Rodriguez-Carvajal (jrc@ill.eu)  
# Improvements will be progressively added as needed.  
# Date: 28/05/2024 Time: 22:40:38.695
```

```
#####  
=====  
data_global  
#####  
=====
```

```
_audit_creation_date 28/05/2024  
_audit_creation_method "FullProf Suite"  
# PROCESSING SUMMARY (IUCr Office Use Only)
```

```
_journal_data_validation_number ?  
  
_journal_date_recd_electronic ?  
_journal_date_to_coeditor ?  
_journal_date_from_coeditor ?  
_journal_date_accepted ?  
_journal_date_printers_first ?  
_journal_date_printers_final ?  
_journal_date_proofs_out ?  
_journal_date_proofs_in ?  
_journal_coeditor_name ?  
_journal_coeditor_code ?  
_journal_coeditor_notes  
; ?  
;  
_journal_techeditor_code ?  
_journal_techeditor_notes
```

```

;?
;
_journal_coden_ASTM      ?
_journal_name_full      ?
_journal_year            ?
_journal_volume          ?
_journal_issue           ?
_journal_page_first     ?
_journal_page_last      ?
_journal_paper_category  ?
_journal_suppl_publ_number ?
_journal_suppl_publ_pages ?

```

```

#-----
=====

```

# 1. SUBMISSION DETAILS

```

_publ_contact_author_name    ? # Name of author for correspondence
_publ_contact_author_address # Address of author for correspondence
;?
;
_publ_contact_author_email    ?
_publ_contact_author_fax      ?
_publ_contact_author_phone    ?

```

```

_publ_contact_letter
;?
;

```

```

_publ_requested_journal      ?
_publ_requested_coeditor_name ?
_publ_requested_category     ? # Acta C: one of CI/CM/CO/FI/FM/FO

```

# Definition of non standard CIF items (Reliability indices used in FULLPROF)

```

loop_
_publ_manuscript_incl_extra_item
_publ_manuscript_incl_extra_info
_publ_manuscript_incl_extra_defn
#   Name                Explanation                Standard?
#   -----                -----                -----
'_pd_proc_ls_prof_cR_factor' 'Prof. R-factor CORRECTED for background' no
'_pd_proc_ls_prof_cwR_factor' 'wProf.R-factor CORRECTED for background' no
'_pd_proc_ls_prof_cwR_expected' 'wProf.Expected CORRECTED for background' no
'_pd_proc_ls_prof_chi2'      'Chi-square for all considered points' no
'_pd_proc_ls_prof_echi2'     'Chi-2 for points with Bragg contribution' no

```

```

#-----
=====

```

### # 3. TITLE AND AUTHOR LIST

```
_publ_section_title
;' Ceria'
;
_publ_section_title_footnote
;
;
```

# The loop structure below should contain the names and addresses of all  
# authors, in the required order of publication. Repeat as necessary.

```
loop_
  _publ_author_name
  _publ_author_footnote
  _publ_author_address
?          #<--'Last name, first name'
;?
;
;?
;
```

```
#####  
=====
```

### # 4. TEXT

```
_publ_section_synopsis
; ?
;
_publ_section_abstract
;?
;
_publ_section_comment
;?
;
_publ_section_exptl_prep  # Details of the preparation of the sample(s)
                          # should be given here.
;?
;
_publ_section_exptl_refinement
;?
;
_publ_section_references
;?
;
_publ_section_figure_captions
;?
;
```

```
_publ_section_acknowledgements
;?
;
```

```
#=====
=====
```

```
#=====
=====
```

```
# If more than one structure is reported, the remaining sections should be
# completed per structure. For each data set, replace the '?' in the
# data_? line below by a unique identifier.
```

```
data_Cubic
```

```
#=====
=====
```

## # 5. CHEMICAL DATA

```
_chemical_name_systematic
;?
;
```

```
_chemical_name_common      ?
_chemical_formula_moiety    ?
_chemical_formula_structural ?
_chemical_formula_analytical ?
_chemical_formula_iupac     ?
_chemical_formula_sum       ?
_chemical_formula_weight    ?
_chemical_melting_point     ?
_chemical_compound_source   ? # for minerals and
                             # natural products
```

```
loop_
```

```
_atom_type_symbol
_ atom_type_scatter_Cromer_Mann_a1
_ atom_type_scatter_Cromer_Mann_b1
_ atom_type_scatter_Cromer_Mann_a2
_ atom_type_scatter_Cromer_Mann_b2
_ atom_type_scatter_Cromer_Mann_a3
_ atom_type_scatter_Cromer_Mann_b3
_ atom_type_scatter_Cromer_Mann_a4
_ atom_type_scatter_Cromer_Mann_b4
_ atom_type_scatter_Cromer_Mann_c
_ atom_type_scatter_dispersion_real
_ atom_type_scatter_dispersion_imag
_ atom_type_scatter_source
ce 21.16710 2.81219 19.76950 0.22684 11.85130 17.60830
   3.33049 127.11300 1.86264 -2.17000 9.64800
```

International\_Tables\_for\_Crystallography\_Vol.C(1991)\_Tables\_6.1.1.4\_and\_6.1.1.5  
o 3.04850 13.27710 2.28680 5.70110 1.54630 0.32390  
0.86700 32.90890 0.25080 0.04700 0.03200  
International\_Tables\_for\_Crystallography\_Vol.C(1991)\_Tables\_6.1.1.4\_and\_6.1.1.5

#=====

## # 6. POWDER SPECIMEN AND CRYSTAL DATA

\_symmetry\_cell\_setting           Cubic  
\_symmetry\_space\_group\_name\_H-M   'F m -3 m'  
\_symmetry\_space\_group\_name\_Hall   '-F 4 2 3'

loop\_

  \_symmetry\_equiv\_pos\_as\_xyz

'x,y,z'  
'x,-y,-z'  
'-x,y,-z'  
'-x,-y,z'  
'y,z,x'  
'-y,-z,x'  
'y,-z,-x'  
'-y,z,-x'  
'z,x,y'  
'-z,x,-y'  
'-z,-x,y'  
'z,-x,-y'  
'y,x,z'  
'-y,x,-z'  
'y,-x,-z'  
'-y,-x,z'  
'z,y,x'  
'-z,-y,x'  
'-z,y,-x'  
'z,-y,-x'  
'x,z,y'  
'x,-z,-y'  
'-x,-z,y'  
'-x,z,-y'  
'-x,-y,-z'  
'-x,y,z'  
'x,-y,z'  
'x,y,-z'  
'-y,-z,-x'  
'y,z,-x'  
'-y,z,x'  
'y,-z,x'  
'-z,-x,-y'  
'z,-x,y'

'z,x,-y'  
'-z,x,y'  
'-y,-x,-z'  
'y,-x,z'  
'-y,x,z'  
'y,x,-z'  
'-z,-y,-x'  
'z,y,-x'  
'z,-y,x'  
'-z,y,x'  
'-x,-z,-y'  
'-x,z,y'  
'x,z,-y'  
'x,-z,y'  
'x+1/2,y+1/2,z'  
'x+1/2,-y+1/2,-z'  
'-x+1/2,y+1/2,-z'  
'-x+1/2,-y+1/2,z'  
'y+1/2,z+1/2,x'  
'-y+1/2,-z+1/2,x'  
'y+1/2,-z+1/2,-x'  
'-y+1/2,z+1/2,-x'  
'z+1/2,x+1/2,y'  
'-z+1/2,x+1/2,-y'  
'-z+1/2,-x+1/2,y'  
'z+1/2,-x+1/2,-y'  
'y+1/2,x+1/2,z'  
'-y+1/2,x+1/2,-z'  
'y+1/2,-x+1/2,-z'  
'-y+1/2,-x+1/2,z'  
'z+1/2,y+1/2,x'  
'-z+1/2,-y+1/2,x'  
'-z+1/2,y+1/2,-x'  
'z+1/2,-y+1/2,-x'  
'x+1/2,z+1/2,y'  
'x+1/2,-z+1/2,-y'  
'-x+1/2,-z+1/2,y'  
'-x+1/2,z+1/2,-y'  
'-x+1/2,-y+1/2,-z'  
'-x+1/2,y+1/2,z'  
'x+1/2,-y+1/2,z'  
'x+1/2,y+1/2,-z'  
'-y+1/2,-z+1/2,-x'  
'y+1/2,z+1/2,-x'  
'-y+1/2,z+1/2,x'  
'y+1/2,-z+1/2,x'  
'-z+1/2,-x+1/2,-y'  
'z+1/2,-x+1/2,y'  
'z+1/2,x+1/2,-y'  
'-z+1/2,x+1/2,y'



'-y+1/2,-x+1/2,-z'  
'y+1/2,-x+1/2,z'  
'-y+1/2,x+1/2,z'  
'y+1/2,x+1/2,-z'  
'-z+1/2,-y+1/2,-x'  
'z+1/2,y+1/2,-x'  
'z+1/2,-y+1/2,x'  
'-z+1/2,y+1/2,x'  
'-x+1/2,-z+1/2,-y'  
'-x+1/2,z+1/2,y'  
'x+1/2,z+1/2,-y'  
'x+1/2,-z+1/2,y'  
'x+1/2,y,z+1/2'  
'x+1/2,-y,-z+1/2'  
'-x+1/2,y,-z+1/2'  
'-x+1/2,-y,z+1/2'  
'y+1/2,z,x+1/2'  
'-y+1/2,-z,x+1/2'  
'y+1/2,-z,-x+1/2'  
'-y+1/2,z,-x+1/2'  
'z+1/2,x,y+1/2'  
'-z+1/2,x,-y+1/2'  
'-z+1/2,-x,y+1/2'  
'z+1/2,-x,-y+1/2'  
'y+1/2,x,z+1/2'  
'-y+1/2,x,-z+1/2'  
'y+1/2,-x,-z+1/2'  
'-y+1/2,-x,z+1/2'  
'z+1/2,y,x+1/2'  
'-z+1/2,-y,x+1/2'  
'-z+1/2,y,-x+1/2'  
'z+1/2,-y,-x+1/2'  
'x+1/2,z,y+1/2'  
'x+1/2,-z,-y+1/2'  
'-x+1/2,-z,y+1/2'  
'-x+1/2,z,-y+1/2'  
'-x+1/2,-y,-z+1/2'  
'-x+1/2,y,z+1/2'  
'x+1/2,-y,z+1/2'  
'x+1/2,y,-z+1/2'  
'-y+1/2,-z,-x+1/2'  
'y+1/2,z,-x+1/2'  
'-y+1/2,z,x+1/2'  
'y+1/2,-z,x+1/2'  
'-z+1/2,-x,-y+1/2'  
'z+1/2,-x,y+1/2'  
'z+1/2,x,-y+1/2'  
'-z+1/2,x,y+1/2'  
'-y+1/2,-x,-z+1/2'  
'y+1/2,-x,z+1/2'

'-y+1/2,x,z+1/2'  
'y+1/2,x,-z+1/2'  
'-z+1/2,-y,-x+1/2'  
'z+1/2,y,-x+1/2'  
'z+1/2,-y,x+1/2'  
'-z+1/2,y,x+1/2'  
'-x+1/2,-z,-y+1/2'  
'-x+1/2,z,y+1/2'  
'x+1/2,z,-y+1/2'  
'x+1/2,-z,y+1/2'  
'x,y+1/2,z+1/2'  
'x,-y+1/2,-z+1/2'  
'-x,y+1/2,-z+1/2'  
'-x,-y+1/2,z+1/2'  
'y,z+1/2,x+1/2'  
'-y,-z+1/2,x+1/2'  
'y,-z+1/2,-x+1/2'  
'-y,z+1/2,-x+1/2'  
'z,x+1/2,y+1/2'  
'-z,x+1/2,-y+1/2'  
'-z,-x+1/2,y+1/2'  
'z,-x+1/2,-y+1/2'  
'y,x+1/2,z+1/2'  
'-y,x+1/2,-z+1/2'  
'y,-x+1/2,-z+1/2'  
'-y,-x+1/2,z+1/2'  
'z,y+1/2,x+1/2'  
'-z,-y+1/2,x+1/2'  
'-z,y+1/2,-x+1/2'  
'z,-y+1/2,-x+1/2'  
'x,z+1/2,y+1/2'  
'x,-z+1/2,-y+1/2'  
'-x,-z+1/2,y+1/2'  
'-x,z+1/2,-y+1/2'  
'-x,-y+1/2,-z+1/2'  
'-x,y+1/2,z+1/2'  
'x,-y+1/2,z+1/2'  
'x,y+1/2,-z+1/2'  
'-y,-z+1/2,-x+1/2'  
'y,z+1/2,-x+1/2'  
'-y,z+1/2,x+1/2'  
'y,-z+1/2,x+1/2'  
'-z,-x+1/2,-y+1/2'  
'z,-x+1/2,y+1/2'  
'z,x+1/2,-y+1/2'  
'-z,x+1/2,y+1/2'  
'-y,-x+1/2,-z+1/2'  
'y,-x+1/2,z+1/2'  
'-y,x+1/2,z+1/2'  
'y,x+1/2,-z+1/2'

```
'-z,-y+1/2,-x+1/2'  
'z,y+1/2,-x+1/2'  
'z,-y+1/2,x+1/2'  
'-z,y+1/2,x+1/2'  
'-x,-z+1/2,-y+1/2'  
'-x,z+1/2,y+1/2'  
'x,z+1/2,-y+1/2'  
'x,-z+1/2,y+1/2'
```

```
_cell_length_a          5.4180(6)  
_cell_length_b          5.4180(6)  
_cell_length_c          5.4180(6)  
_cell_angle_alpha       90.0000  
_cell_angle_beta        90.0000  
_cell_angle_gamma       90.0000  
_cell_volume            159.04(3)  
_cell_formula_units_Z   ?  
_cell_measurement_temperature ?  
_cell_special_details  
; ?  
;
```

```
# The next three fields give the specimen dimensions in mm. The equatorial  
# plane contains the incident and diffracted beam.
```

```
_pd_spec_size_axial      ?    # perpendicular to  
                          # equatorial plane  
_pd_spec_size_equat      ?    # parallel to  
                          # scattering vector  
                          # in transmission  
_pd_spec_size_thick      ?    # parallel to  
                          # scattering vector  
                          # in reflection
```

```
# The next five fields are character fields that describe the specimen.
```

```
_pd_spec_mounting        # This field should be  
                          # used to give details of the  
                          # container.  
; ?  
;  
_pd_spec_mount_mode      ?    # options are 'reflection'  
                          # or 'transmission'  
_pd_spec_shape           ?    # options are 'cylinder'  
                          # 'flat_sheet' or 'irregular'  
_pd_char_particle_morphology ?  
_pd_char_colour          ?    # use ICDD colour descriptions
```

```
# The following three fields describe the preparation of the specimen.  
# The cooling rate is in K/min. The pressure at which the sample was  
# prepared is in kPa. The temperature of preparation is in K.
```

```
_pd_prep_cool_rate      ?
_pd_prep_pressure      ?
_pd_prep_temperature    ?
```

# The next four fields are normally only needed for transmission experiments.

```
_exptl_absorpt_coefficient_mu    ?
_exptl_absorpt_correction_type    ?
_exptl_absorpt_process_details    ?
_exptl_absorpt_correction_T_min    ?
_exptl_absorpt_correction_T_max    ?
```

```
#=====
=====
```

## # 7. EXPERIMENTAL DATA

```
_exptl_special_details
;?
;
```

# The following item is used to identify the equipment used to record  
# the powder pattern when the diffractogram was measured at a laboratory  
# other than the authors' home institution, e.g. when neutron or synchrotron  
# radiation is used.

```
_pd_instr_location
;?
;
_pd_calibration_special_details    # description of the method used
                                   # to calibrate the instrument
;?
;
```

```
_diffrn_ambient_temperature      ?
_diffrn_source                    ? # Put here: 'rotating-anode X-ray tube' or similar
_diffrn_radiation_type            'X-ray'
_diffrn_source_target             ? # Put here the chemical symbol of the anode
```

```
_diffrn_radiation_monochromator    ?
_diffrn_measurement_device_type    ?
_diffrn_measurement_method        ?
_diffrn_detector_area_resol_mean   ?
_diffrn_detector                   ?
_diffrn_detector_type              ? # make or model of detector
_pd_meas_scan_method               ? # options are 'step', 'cont',
                                   # 'tof', 'fixed' or
                                   # 'disp' (= dispersive)
_pd_meas_special_details
```

```
; ?  
;
```

```
# The following four items give details of the measured (not processed)  
# powder pattern. Angles are in degrees.
```

```
_pd_meas_number_of_points      1576  
_pd_meas_2theta_range_min      23.01871  
_pd_meas_2theta_range_max      74.99371  
_pd_meas_2theta_range_inc      0.033000
```

```
#=====
```

## # 8. REFINEMENT DATA

```
_refine_special_details  
; ?  
;
```

```
# Use the next field to give any special details about the fitting of the  
# powder pattern.
```

```
_pd_proc_ls_special_details  
; ?  
;
```

```
# The next three items are given as text.
```

```
_pd_proc_ls_profile_function    ?  
_pd_proc_ls_background_function ?  
_pd_proc_ls_pref_orient_corr  
; ?  
;
```

```
# The following profile R-factors are NOT CORRECTED for background  
# The sum is extended to all non-excluded points.  
# These are the current CIF standard
```

```
_pd_proc_ls_prof_R_factor      9.3299  
_pd_proc_ls_prof_wR_factor     12.0253  
_pd_proc_ls_prof_wR_expected   8.9530
```

```
# The following profile R-factors are CORRECTED for background  
# The sum is extended to all non-excluded points.  
# These items are not in the current CIF standard, but are defined above
```

```
_pd_proc_ls_prof_cR_factor     48.4323  
_pd_proc_ls_prof_cwR_factor    31.9397  
_pd_proc_ls_prof_cwR_expected  23.7795
```

# The following items are not in the CIF standard, but are defined above

\_pd\_proc\_ls\_prof\_chi2            1.8041  
\_pd\_proc\_ls\_prof\_echi2         1.2533

# Items related to LS refinement

\_refine\_ls\_R\_I\_factor            3.3016  
\_refine\_ls\_number\_reflns         14  
\_refine\_ls\_number\_parameters     7  
\_refine\_ls\_number\_restraints     0

# The following four items apply to angular dispersive measurements.  
# 2theta minimum, maximum and increment (in degrees) are for the  
# intensities used in the refinement.

\_pd\_proc\_2theta\_range\_min        22.9413  
\_pd\_proc\_2theta\_range\_max        74.9163  
\_pd\_proc\_2theta\_range\_inc        0.033000  
\_pd\_proc\_wavelength              1.540560

\_pd\_block\_diffraction\_id        ? # The id used for the block containing  
                                      # the powder pattern profile (section 11)

# Give appropriate details in the next two text fields.

\_pd\_proc\_info\_excluded\_regions   ?  
\_pd\_proc\_info\_data\_reduction     ?

# The following items are used to identify the programs used.

\_computing\_data\_collection       ?  
\_computing\_structure\_solution    ?  
\_computing\_structure\_refinement  FULLPROF  
\_computing\_molecular\_graphics    ?  
\_computing\_publication\_material  ?

#=====

# 9. ATOMIC COORDINATES AND DISPLACEMENT PARAMETERS

loop\_  
  \_atom\_site\_label  
  \_atom\_site\_fract\_x  
  \_atom\_site\_fract\_y  
  \_atom\_site\_fract\_z  
  \_atom\_site\_U\_iso\_or\_equiv  
  \_atom\_site\_occupancy

```
_atom_site_adp_type
_atom_site_type_symbol
Ce 0.00000 0.00000 0.00000 0.00773 1.00000 Uiso Ce
O 0.25000 0.25000 0.25000 -0.0172 1.09084 Uiso O
```

```
# Note: if the displacement parameters were refined anisotropically
# the U matrices should be given as for single-crystal studies.
```

```
#=====
```

```
# 10. DISTANCES AND ANGLES / MOLECULAR GEOMETRY
```

```
_geom_special_details      ?
```

```
loop_
  _geom_bond_atom_site_label_1
  _geom_bond_atom_site_label_2
  _geom_bond_site_symmetry_1
  _geom_bond_site_symmetry_2
  _geom_bond_distance
  _geom_bond_publ_flag
  ? ? ? ? ? ?
```

```
loop_
  _geom_contact_atom_site_label_1
  _geom_contact_atom_site_label_2
  _geom_contact_distance
  _geom_contact_site_symmetry_1
  _geom_contact_site_symmetry_2
  _geom_contact_publ_flag
  ? ? ? ? ? ?
```

```
loop_
  _geom_angle_atom_site_label_1
  _geom_angle_atom_site_label_2
  _geom_angle_atom_site_label_3
  _geom_angle_site_symmetry_1
  _geom_angle_site_symmetry_2
  _geom_angle_site_symmetry_3
  _geom_angle
  _geom_angle_publ_flag
  ? ? ? ? ? ? ? ?
```

```
loop_
  _geom_torsion_atom_site_label_1
  _geom_torsion_atom_site_label_2
  _geom_torsion_atom_site_label_3
  _geom_torsion_atom_site_label_4
  _geom_torsion_site_symmetry_1
```

\_geom\_torsion\_site\_symmetry\_2  
\_geom\_torsion\_site\_symmetry\_3  
\_geom\_torsion\_site\_symmetry\_4  
\_geom\_torsion  
\_geom\_torsion\_publ\_flag  
? ? ? ? ? ? ? ? ? ?

loop\_  
\_geom\_hbond\_atom\_site\_label\_D  
\_geom\_hbond\_atom\_site\_label\_H  
\_geom\_hbond\_atom\_site\_label\_A  
\_geom\_hbond\_site\_symmetry\_D  
\_geom\_hbond\_site\_symmetry\_H  
\_geom\_hbond\_site\_symmetry\_A  
\_geom\_hbond\_distance\_DH  
\_geom\_hbond\_distance\_HA  
\_geom\_hbond\_distance\_DA  
\_geom\_hbond\_angle\_DHA  
\_geom\_hbond\_publ\_flag  
? ? ? ? ? ? ? ? ? ?

#=====  
=====

#=====  
=====

# Additional structures (last six sections and associated data\_? identifiers)  
# may be added at this point.

#=====  
=====

# The following lines are used to test the character set of files sent by  
# network email or other means. They are not part of the CIF data set.  
# abcdefghijklmnopqrstuvwxyzABCDEFGHIJKLMNOPQRSTUVWXYZ0123456789  
# !@#\$%^&\*()\_+{ }:"~<>?\|-=[];' ,./
